# Supplementary material
Source: PubMed Central journal article supplement (PMC10481324)
Supplement: jamaneurol-e232968-s001.pdf [file jamaneurol-e232968-s001.pdf]

## Supplemental Online Content

Grimaldi L, Papeix C, Hamon Y, et al. Vaccines and the risk of hospitalization for multiple sclerosis flare-ups. *JAMA Neurol*. Published online September 5, 2023. doi:10.1001/jamaneurol.2023.2968

**eFigure.** Flowchart of the Studied Multiple Sclerosis Cohort from the SNDS

**eTable 1.** List of SNDS Codes to Capture the Dispensing of a Multiple Sclerosis Disease-Modifying Treatment and High-Dose Corticosteroids in a Given Year

**eTable 2.** Specific Multiple Sclerosis Diagnosis Codes in the SNDS French Health Care Database

**eTable 3.** Use of Vaccines in the Multiple Sclerosis Cohort According to Age Group

**eTable 4.** Association of Multiple Sclerosis Flare-Ups Requiring Hospitalization and Vaccines Exposure According to Age and Type of Vaccine (60-Day Time Window)

**eTable 5.** Sensitivity Analysis of the Association of Multiple Sclerosis Flare-Ups Requiring Hospitalization and Vaccines Exposure According to 2 Different Time Windows (30-Day Time Window and 90-Day Time Window)

This supplemental material has been provided by the authors to give readers additional information about their work.

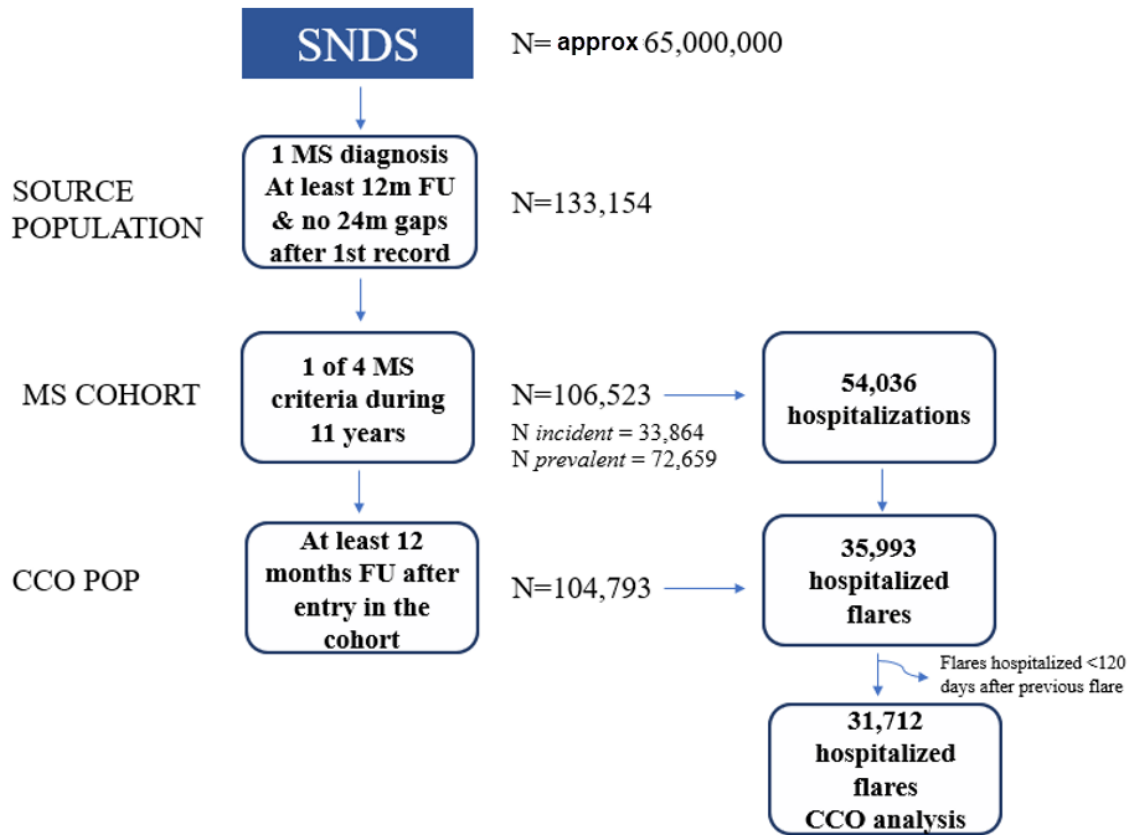

**eFigure.** Flowchart of the Studied Multiple Sclerosis Cohort from the SNDS

Abbreviations: SNDS: System of National Health Databases; FU: follow-up; CCO POP: case-crossover population

**eTable 1.** List of SNDS Codes to Capture the Dispensing of a Multiple Sclerosis Disease-Modifying Treatment and High-Dose Corticosteroids in a Given Year

- MS disease-modifying therapies
  - [beta]interferon
  - dimethyl fumarate
  - fampridine
  - fingolimod
  - glatiramer acetate
  - mitoxantrone
  - monoclonal antibodies: alemtuzumab, natalizumab ocrelizumab
  - teriInfluzanamide

---

- High-dose corticosteroids
  - Betamethasone arw 2mg cpr disp 20
  - Betamethasone bga 2mg cpr disp 20
  - Betamethasone eg 2mg cpr disp 20
  - Betamethasone ztv 2mg cpr disp 20
  - Betnesol 4 mg sol inj 3
  - Celestene 2mg cpr disp 20
  - Celestene 4 mg sol inj 3
  - Celestene 8mg/2ml sol inj 1
  - Celestene chrono 5,70 mg/ml inj+nec 1
  - Diprostene susp inj 1
  - Cepo medrol 80mg/2ml inj ser 1/2 ml
  - Depo-medrol 0,040 g 1 flacon de 1 ml avec seringue
  - Depo-medrol 40 mg/1 ml (acetate de methyl predniso
  - Medrol 100mg cpr 30
  - Medrol 16mg cpr 20
  - Medrol 4mg cpr 30
  - Methyl prednisolone dakota pharm 120 mg (succinate)
  - Methyl prednisolone dakota pharm 20 mg (succinate)
  - Methyl prednisolone dakota pharm 20 mg (succinate)
  - Solpredone 120 mg (methylprednisolone) 1 flacon ly
  - Solpredone 20 mg (methylprednisolone) 1 flacon lyo
  - Solumedrol 1000 mg pdr et sol inj 1
  - Solumedrol 120 mg pdr et sol inj 1
  - Solumedrol 120 mg pdr et sol inj 1
  - Solumedrol 120 mg pdr et sol inj 1

---

**eTable 2. Specific Multiple Sclerosis Diagnosis Codes in the SNDS French Health Care Database**

---

- Hospital discharge diagnosis with ICD-10 code for a general or a specific MS (principal, relative or associated diagnosis)
    - G35: Multiple sclerosis
- 
- MS-related disorders
    - F068: Other specified mental disorders due to known physiological condition
    - F078: Other personality and behavioral disorders due to known physiological condition
    - F079: Unspecified personality and behavioral disorder due to known physiological condition
    - G040: Acute disseminated encephalitis and encephalomyelitis (ADEM)
    - G048: Other encephalitis, myelitis and encephalomyelitis
    - G049: Encephalitis, myelitis and encephalomyelitis, unspecified
    - G058: Encephalitis, myelitis and encephalomyelitis in other diseases classified elsewhere
    - G111: Early-onset cerebellar ataxia
    - G112: Late-onset cerebellar ataxia
    - G122: Motor neuron disease
    - G360: Neuromyelitis Optica [Devic]
    - G368: Other specified acute disseminated demyelination
    - G369: Acute disseminated demyelination, unspecified
    - G373: Acute transverse myelitis in demyelinating disease of central nervous system
    - G378: Other specified demyelinating diseases of central nervous system
    - G379: Demyelinating disease of central nervous system, unspecified
    - G800: Spastic quadriplegic cerebral palsy
    - G801: Spastic diplegic cerebral palsy
    - G802: Spastic hemiplegic cerebral palsy
    - G810: Flaccid hemiplegia
    - G811: Spastic hemiplegia
    - G819: Hemiplegia, unspecified
    - G820: Flaccid paraplegia
    - G821: Spastic paraplegia
    - G822: Paraplegia, unspecified
    - G823: Flaccid tetraplegia
    - G824: Spastic tetraplegia
    - G825: Tetraplegia, unspecified
    - G831: Monoplegia of lower limb
    - G832: Monoplegia of upper limb
    - G833: Monoplegia, unspecified
    - G838: Other specified paralytic syndromes
    - G839: Paralytic syndrome, unspecified
    - G948: Other specified disorders of brain in diseases classified elsewhere
    - G950: Syringomyelia and syringobulbia
    - G958: Other specified diseases of spinal cord
    - G968: Other specified disorders of central nervous system
    - G969: Disorder of central nervous system, unspecified
    - G98: Other disorders of nervous system, not elsewhere classified
    - G998: Other specified disorders of nervous system in diseases classified elsewhere
    - H46: Optic neuritis
    - H471: Papilloedema, unspecified
-

- 
- H480: Optic atrophy in diseases classified elsewhere
  - H481: Retrobulbar neuritis in diseases classified elsewhere
  - H488: Other disorders of optic nerve and visual pathways in diseases classified elsewhere
  - H490: Third [oculomotor] nerve palsy
  - H491: Fourth [trochlear] nerve palsy
  - H493: Total (external) ophthalmoplegia
  - H512: Internuclear ophthalmoplegia
  - H532: Diplopia
  - H534: Visual field defects
  - H535: Color vision deficiencies
  - H538: Other visual disturbances
  - H539: Visual disturbance, unspecified
  - H540: Blindness, binocular
  - H541: Severe visual impairment, binocular
  - H542: Moderate visual impairment, binocular
  - H544: Blindness, monocular
  - H545: Severe visual impairment, monocular
  - H549: Unspecified visual impairment (binocular)
  - H55: Nystagmus and other irregular eye movements
  - H814: Vertigo of central origin
  - R201: Hypoesthesia of skin
  - R202: Paresthesia of skin
  - R203: Hyperesthesia
  - R208: Other and unspecified disturbances of skin sensation
  - R260: Ataxic gait
  - R261: Paralytic gait
  - R262: Difficulty in walking, not elsewhere classified
  - R268: Other and unspecified abnormalities of gait and mobility
  - R27: Other lack of coordination
  - R298: Other and unspecified symptoms, signs involving nervous and musculoskeletal systems
  - R4700: Recent aphasia, persisting beyond 24 hours
-

**eTable 3.** Use of Vaccines in the Multiple Sclerosis Cohort According to Age Group

|                       | <b>&lt;18 years old</b> | <b>18-34 years old</b> | <b>35-69 years old</b> | <b>≥70 years old</b> | <b>MS Cohort</b> |
|-----------------------|-------------------------|------------------------|------------------------|----------------------|------------------|
| % Patient (N, %)      | n=1,297                 | n=28,945               | n=72,188               | n=4,093              | n=106,523        |
| <b>Any vaccine</b>    | 642 (49.5%)             | 11,710 (40.5%)         | 32,762 (45.4%)         | 3,118 (76.2%)        | 48,232 (45.3%)   |
| DTPPHi*               | 506 (39.0%)             | 9,831 (34.0%)          | 21,109 (29.2%)         | 794 (19.4%)          | 32,240 (30.3%)   |
| Influenza             | 68 (5.2%)               | 1,694 (5.9%)           | 15,802 (21.9%)         | 2,933 (71.7%)        | 20,497 (19.2%)   |
| Pneumococcus          | 61 (4.7%)               | 1,602 (5.5%)           | 5,230 (7.2%)           | 584 (14.3%)          | 7,477 (7.0%)     |
| Other vaccines        | 269 (20.7%)             | 1,558 (5.4%)           | 1,232 (1.7%)           | 23 (0.6%)            | 3,082 (2.9%)     |
| <i>Me/Mu/Ru</i>       | 47 (3.6%)               | 633 (2.2%)             | 174 (0.2%)             | 8 (0.2%)             | 862 (0.8%)       |
| <i>HPV</i>            | 123 (9.5%)              | 121 (0.4%)             | 102 (0.1%)             | 0 (0.0%)             | 346 (0.3%)       |
| <i>HBV</i>            | 72 (5.6%)               | 295 (1.0%)             | 383 (0.5%)             | 6 (0.1%)             | 756 (0.7%)       |
| <i>Meningococcus</i>  | 61 (4.7%)               | 250 (0.9%)             | 276 (0.4%)             | 2 (0.0%)             | 589 (0.6%)       |
| <i>Tuberculosis</i>   | 2 (0.2%)                | 79 (0.3%)              | 51 (0.1%)              | 0 (0.0%)             | 132 (0.1%)       |
| <i>Varicella/zona</i> | 13 (1.0%)               | 168 (0.6%)             | 160 (0.2%)             | 7 (0.2%)             | 348 (0.3%)       |
| <i>Hepatitis A</i>    | 2 (0.2%)                | 140 (0.5%)             | 141 (0.2%)             | 0 (0.0%)             | 283 (0.3%)       |

\* Abbreviation: DTPPHi: Any of Diphtheria/Tetanus/Poliomyelitis/Pertussis/*Haemophilus Influenzae*, including DTPPHi+Hepatitis B combination

**eTable 4.** Association of Multiple Sclerosis Flare-Ups Requiring Hospitalization and Vaccines Exposure According to Age and Type of Vaccine (60-Day Time Window)

|                            | 'At-risk time windows' | 'Control time windows' | Crude OR<br>CI[95%] | Adjusted OR<br>CI[95%]* |
|----------------------------|------------------------|------------------------|---------------------|-------------------------|
| <b>&lt;18 years old</b>    | <b>n=318</b>           | <b>n=1,081</b>         |                     |                         |
| <i>DTPPHi</i> <sup>‡</sup> | 7 (2.20%)              | 22 (2.04%)             | 1.08 [0.47 - 2.50]  | 1.10 [0.49 - 2.48]      |
| <i>Influenza</i>           | 1 (0.31%)              | 3 (0.28%)              | Not applicable      | Not applicable          |
| <i>Pneumococcus</i>        | 0 (0.00%)              | 2 (0.19%)              | Not applicable      | Not applicable          |
| <b>18-34 years old</b>     | <b>n=6,075</b>         | <b>n=22,414</b>        |                     |                         |
| <i>DTPPHi</i> <sup>‡</sup> | 62 (1.02%)             | 194 (0.87%)            | 1.18 [0.89 - 1.57]  | 1.17 [0.88 - 1.56]      |
| <i>Influenza</i>           | 18 (0.30%)             | 52 (0.23%)             | 1.28 [0.70 - 2.35]  | 1.24 [0.66 - 2.32]      |
| <i>Pneumococcus</i>        | 9 (0.15%)              | 27 (0.12%)             | 1.23 [0.89 - 2.56]  | 1.10 [0.52 - 2.34]      |
| <b>35-69 years old</b>     | <b>n=23,553</b>        | <b>n=86,736</b>        |                     |                         |
| <i>DTPPHi</i> <sup>‡</sup> | 132 (0.56%)            | 554 (0.64%)            | 0.88 [0.72 - 1.06]  | 0.86 [0.71 - 1.04]      |
| <i>Influenza</i>           | 255 (1.08%)            | 1,062 (1.22%)          | 0.88 [0.77 - 1.01]  | 0.89 [0.78 - 1.02]      |
| <i>Pneumococcus</i>        | 67 (0.28%)             | 194 (0.22%)            | 1.27 [0.97 - 1.67]  | 1.30 [0.98 - 1.72]      |
| <b>≥70 years old</b>       | <b>n=1,766</b>         | <b>n=6,670</b>         |                     |                         |
| <i>DTPPHi</i> <sup>‡</sup> | 9 (0.51%)              | 28 (0.42%)             | 1.22 [0.57 - 2.60]  | 1.20 [0.56 - 2.58]      |
| <i>Influenza</i>           | 157 (8.89%)            | 517 (7.75%)            | 1.16 [0.95 - 1.41]  | 1.17 [0.96 - 1.42]      |
| <i>Pneumococcus</i>        | 5 (0.28%)              | 21 (0.31%)             | 0.90 [0.35 - 2.30]  | 0.79 [0.31 - 1.98]      |

<sup>‡</sup>DTPPHi: Any of Diphtheria/Tetanus/Poliomyelitis/Pertussis/*Haemophilus Influenzae*, including DTPPHi+Hepatitis B combination

\*Adjusted for: visits with a GP, visits with a specialist, occurrence of any hospitalization for reasons other than MS and other vaccines

**eTable 5.** Sensitivity Analysis of the Association of Multiple Sclerosis Flare-Ups Requiring Hospitalization and Vaccines Exposure According to 2 Different Time Windows (30-Day Time Window and 90-Day Time Window)

|                             | <i>'At-risk time windows'</i> | <i>'Control time windows'</i> | Crude OR<br>CI[95%] | Adjusted OR<br>CI[95%]* |
|-----------------------------|-------------------------------|-------------------------------|---------------------|-------------------------|
| <b>Time window = 30-day</b> |                               |                               |                     |                         |
| <b>All age</b>              | <b>n=31,712</b>               | <b>n=125,906</b>              |                     |                         |
| Any vaccine (N, %)          | 392 (1.24%)                   | 1490 (1.18%)                  | 1.05 [0.94 - 1.17]  | 1.04 [0.93 - 1.17]      |
| <i>DTPPHi</i> <sup>‡</sup>  | 124 (0.39%)                   | 409 (0.32%)                   | 1.20 [0.99 - 1.47]  | 1.14 [0.93 - 1.40]      |
| <i>Influenza</i>            | 210 (0.66%)                   | 924 (0.73%)                   | 0.90 [0.78 - 1.04]  | 0.92 [0.79 - 1.07]      |
| <i>Pneumococcus</i>         | 45 (0.14%)                    | 144 (0.11%)                   | 1.24 [0.90 - 1.71]  | 1.20 [0.86 - 1.69]      |
| <b>Time window = 90-day</b> |                               |                               |                     |                         |
| <b>All age</b>              | <b>n=29,861</b>               | <b>n=106,932</b>              |                     |                         |
| Any vaccine (N, %)          | 1047 (3.51%)                  | 3506 (3.28%)                  | 1.07 [1.00 - 1.15]  | 1.07 [1.00 - 1.14]      |
| <i>DTPPHi</i> <sup>‡</sup>  | 308 (1.03%)                   | 1056 (0.99%)                  | 1.04 [0.92 - 1.19]  | 1.03 [0.91 - 1.17]      |
| <i>Influenza</i>            | 633 (2.12%)                   | 2184 (2.04%)                  | 1.04 [0.96 - 1.13]  | 1.03 [0.95 - 1.12]      |
| <i>Pneumococcus</i>         | 117 (0.39%)                   | 255 (0.24%)                   | 1.65 [1.32 - 2.05]  | 1.59 [1.27 - 1.99]      |

<sup>‡</sup>DTPPHi: Any of Diphtheria/Tetanus/Poliomyelitis/Pertussis/*Haemophilus Influenzae*, including DTPPHi+Hepatitis B combination

\*Adjusted for: visits with a GP, visits with a specialist, occurrence of any hospitalization for reasons other than MS and other vaccines
