# Supplementary material
Source: PubMed Central journal article supplement (PMC10481324)
Supplement: jamaneurol-e232968-s002.pdf [file jamaneurol-e232968-s002.pdf]

## Data Sharing Statement

Grimaldi. Vaccines and The Risk of Hospitalization for Multiple Sclerosis Flare-Ups. *JAMA Neurol.* Published September 05, 2023. doi:10.1001/jamaneurol.2023.2968

### Data

**Data available:** No

### Additional Information

**Explanation for why data not available:** Data are the private propriety of the French SNDS health system
